# Supplementary material for: Inherited and De Novo Variation in Lithuanian Genomes: Introduction to the Analysis of the Generational Shift
Source: MDPI journal article supplement (doi:10.3390/genes13040569), 2022-03-23
Supplement: s1 [file s1]

## Supplementary Material

# Inherited and de novo variation in Lithuanian genomes: introduction to the analysis of the generational shift

Alina Urnikyte<sup>1\*</sup>, Laura Pranckieniene<sup>1\*</sup>, Ingrida Domarkiene<sup>1</sup>, Svetlana Dauengauer-Kirliene<sup>1</sup>, Alma Molyte<sup>1</sup>, Ausra Matuleviciene<sup>1</sup>, Ingrida Pilypiene<sup>1</sup>, Vaidutis Kučinskas<sup>1</sup>

<sup>1</sup>Department of Human and Medical Genetics, Biomedical Science Institute, Faculty of Medicine, Vilnius University, Santariskiu Street 2, LT-08661, Vilnius, Lithuania; [alina.urnikyte@mf.vu.lt](mailto:alina.urnikyte@mf.vu.lt); [laura.pranckieniene@mf.vu.lt](mailto:laura.pranckieniene@mf.vu.lt); [ingrida.domarkiene@mf.vu.lt](mailto:ingrida.domarkiene@mf.vu.lt); [svetlana.dauengauer-kirliene@mf.vu.lt](mailto:svetlana.dauengauer-kirliene@mf.vu.lt); [alma.molyte@mf.vu.lt](mailto:alma.molyte@mf.vu.lt); [ausra.matuleviciene@mf.vu.lt](mailto:ausra.matuleviciene@mf.vu.lt); [ingrida.pilypiene@mf.vu.lt](mailto:ingrida.pilypiene@mf.vu.lt); [vaidutis.kucinskas@mf.vu.lt](mailto:vaidutis.kucinskas@mf.vu.lt)

\*Correspondence: [alina.urnikyte@mf.vu.lt](mailto:alina.urnikyte@mf.vu.lt); [laura.pranckieniene@mf.vu.lt](mailto:laura.pranckieniene@mf.vu.lt)

## Supplementary Figures

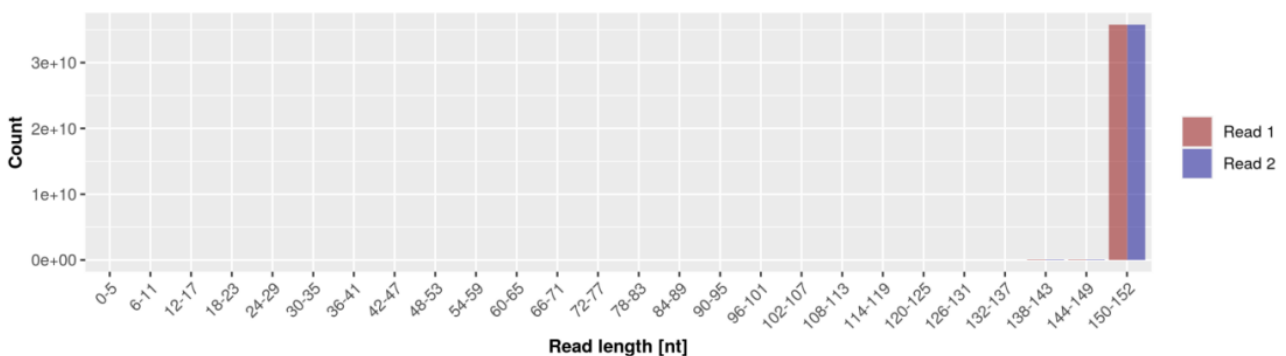

Figure S1. Sequence lengths of trimmed FASTQ reads (average of all samples) (DNA).

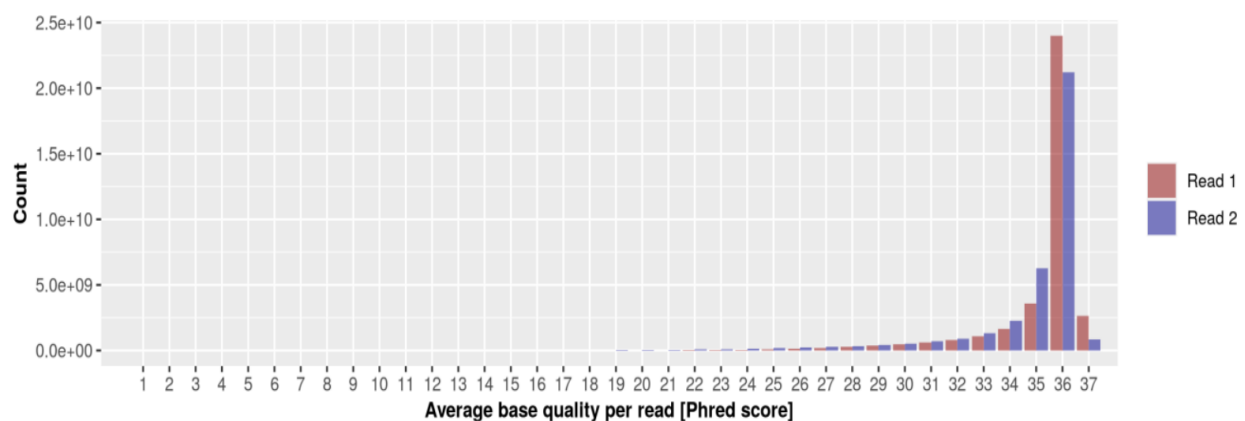

Figure S2. Sequence quality of trimmed FASTQ reads (average of all samples) (DNA).

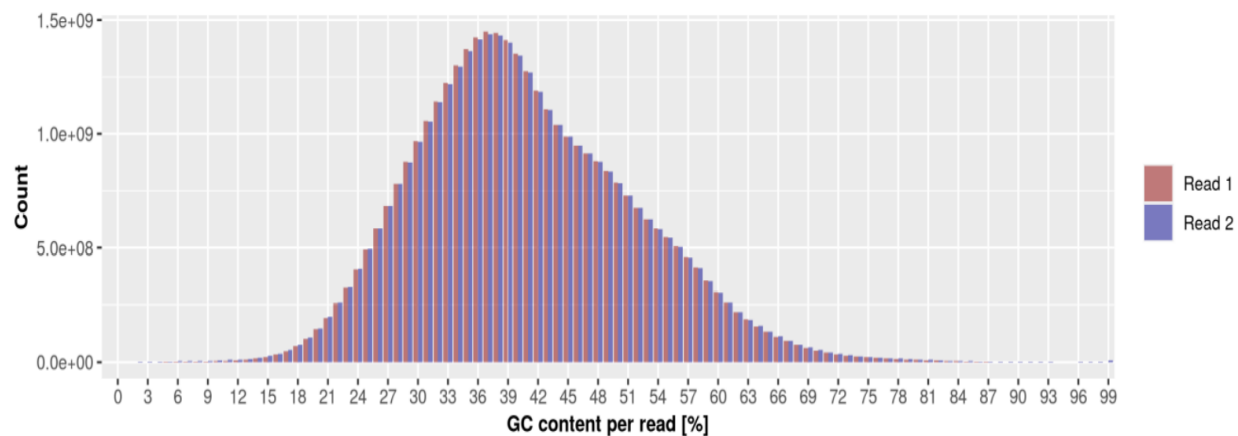

**Figure S3.** GC content of trimmed FASTQ reads (average of all samples) (DNA).

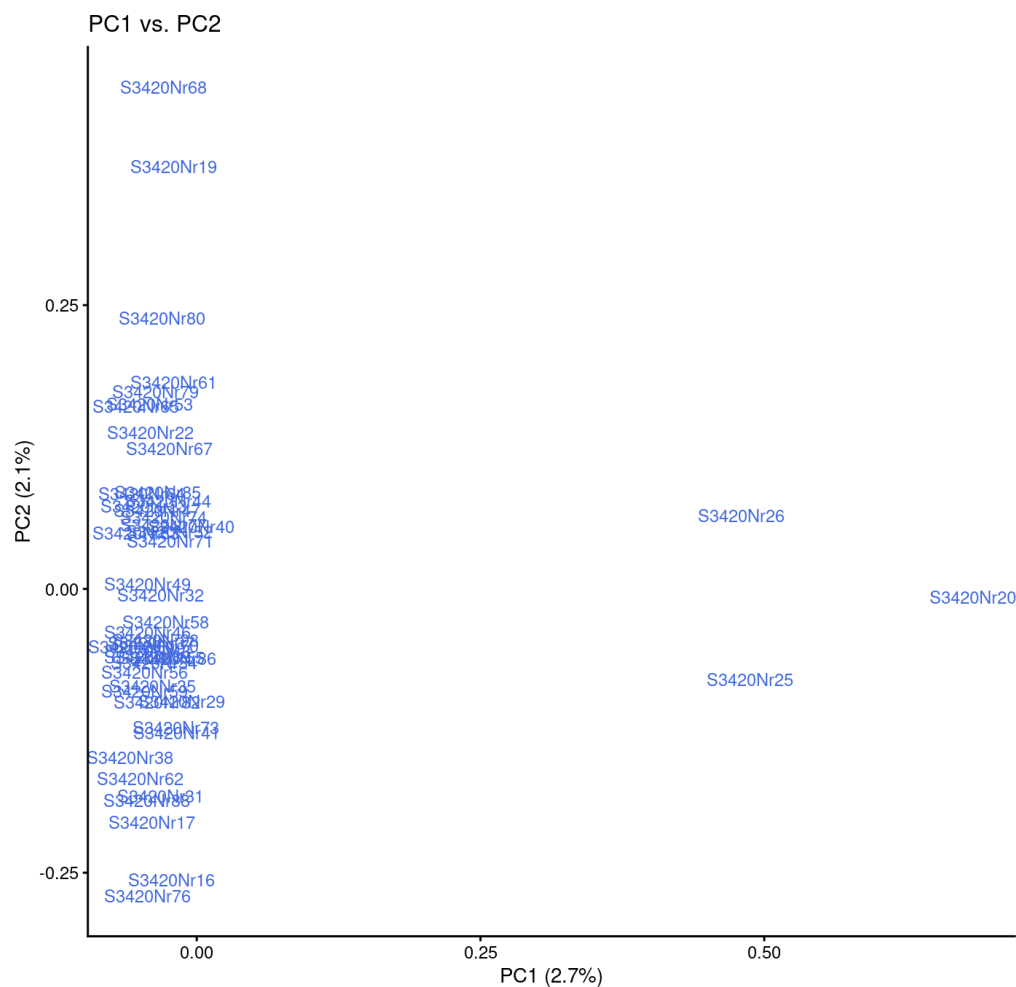

**Figure**

**Figure S4.** Principal component analysis (PCA) of 50 individuals (parents) from Lithuania included in the study.

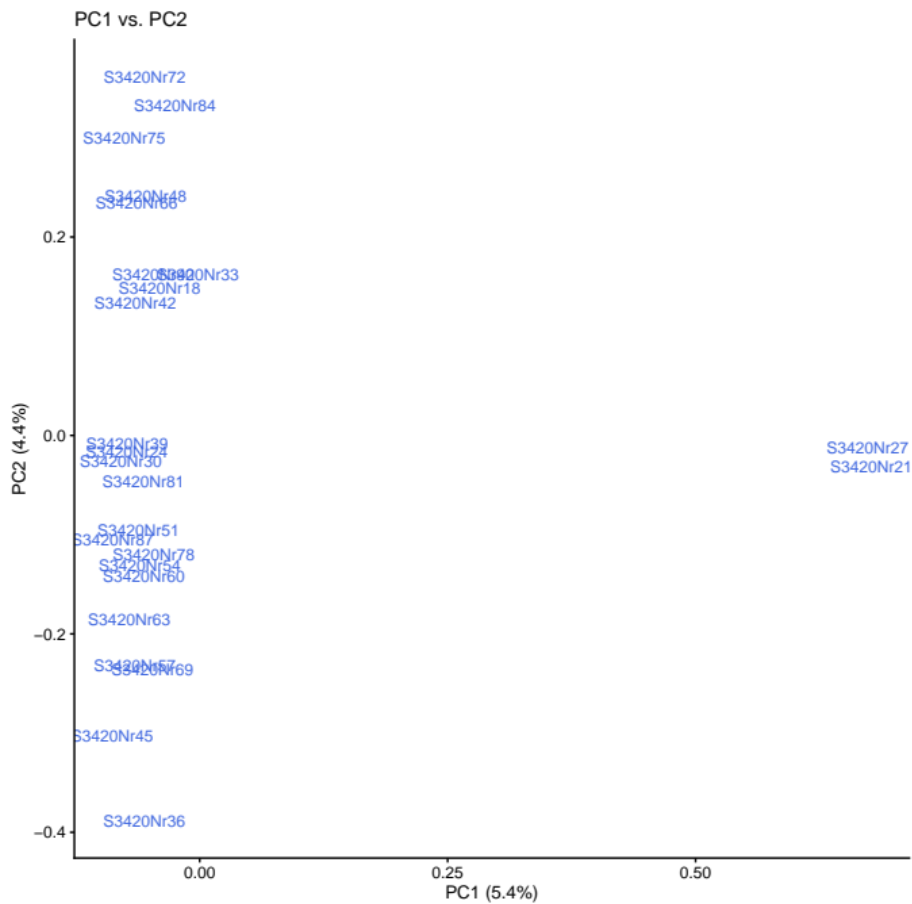

**Figure S5.** Principal component analysis (PCA) of 25 newborns from Lithuania included in the study.

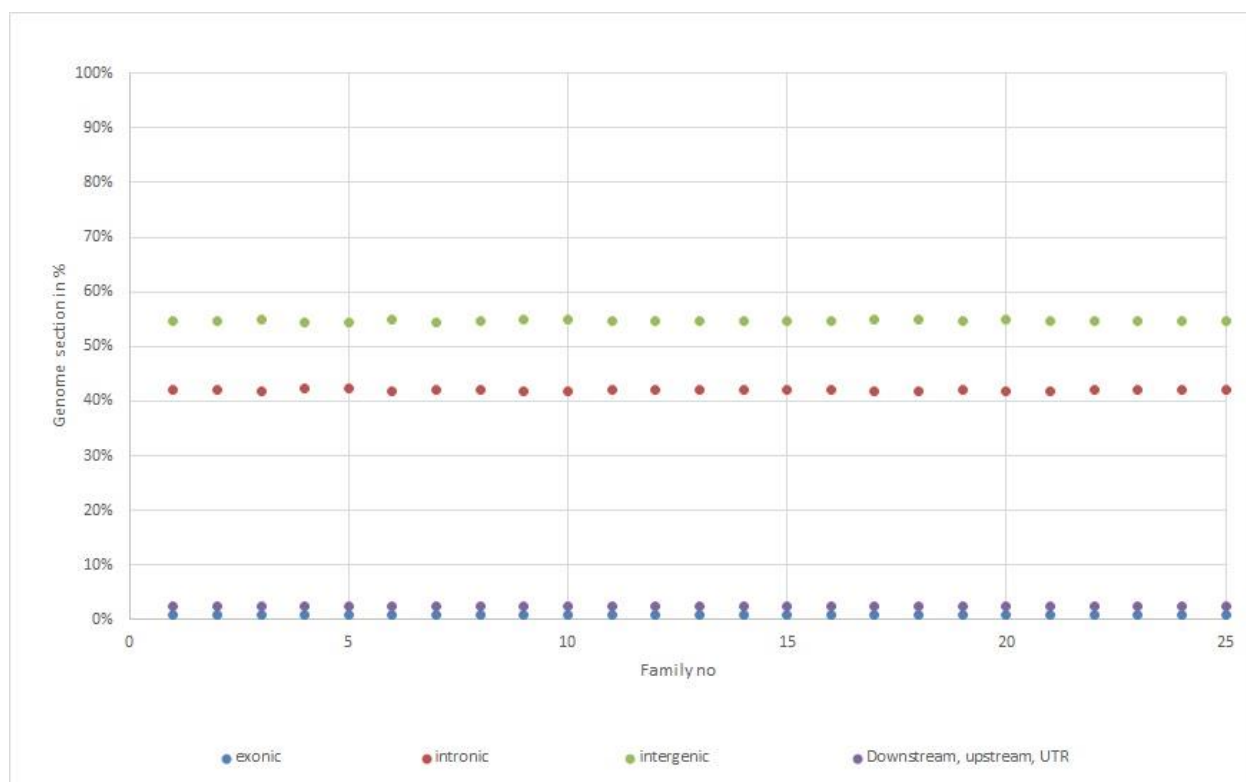

**Figure S6.** Summary of the identified variants. Distribution of SNPs and indels.

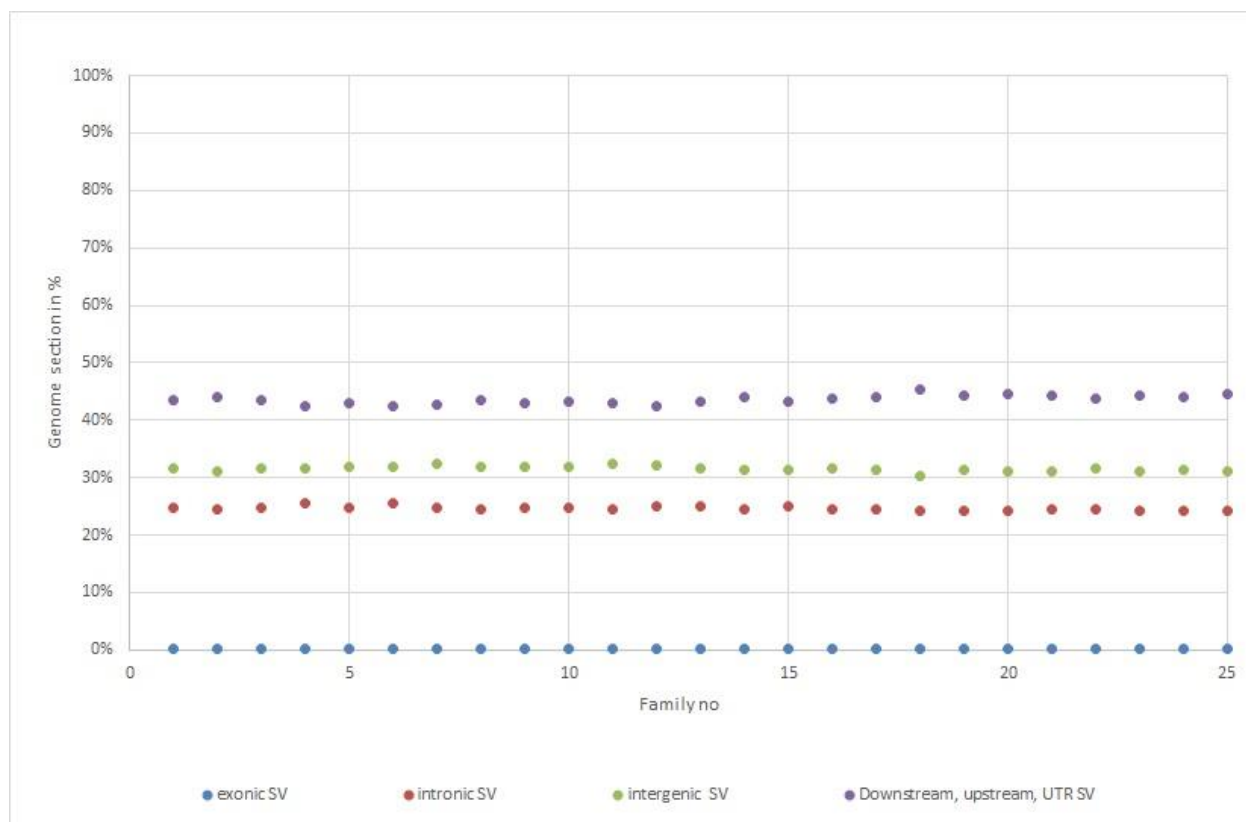

**Figure S7.** Summary of the identified variants. Distribution of structural variants.

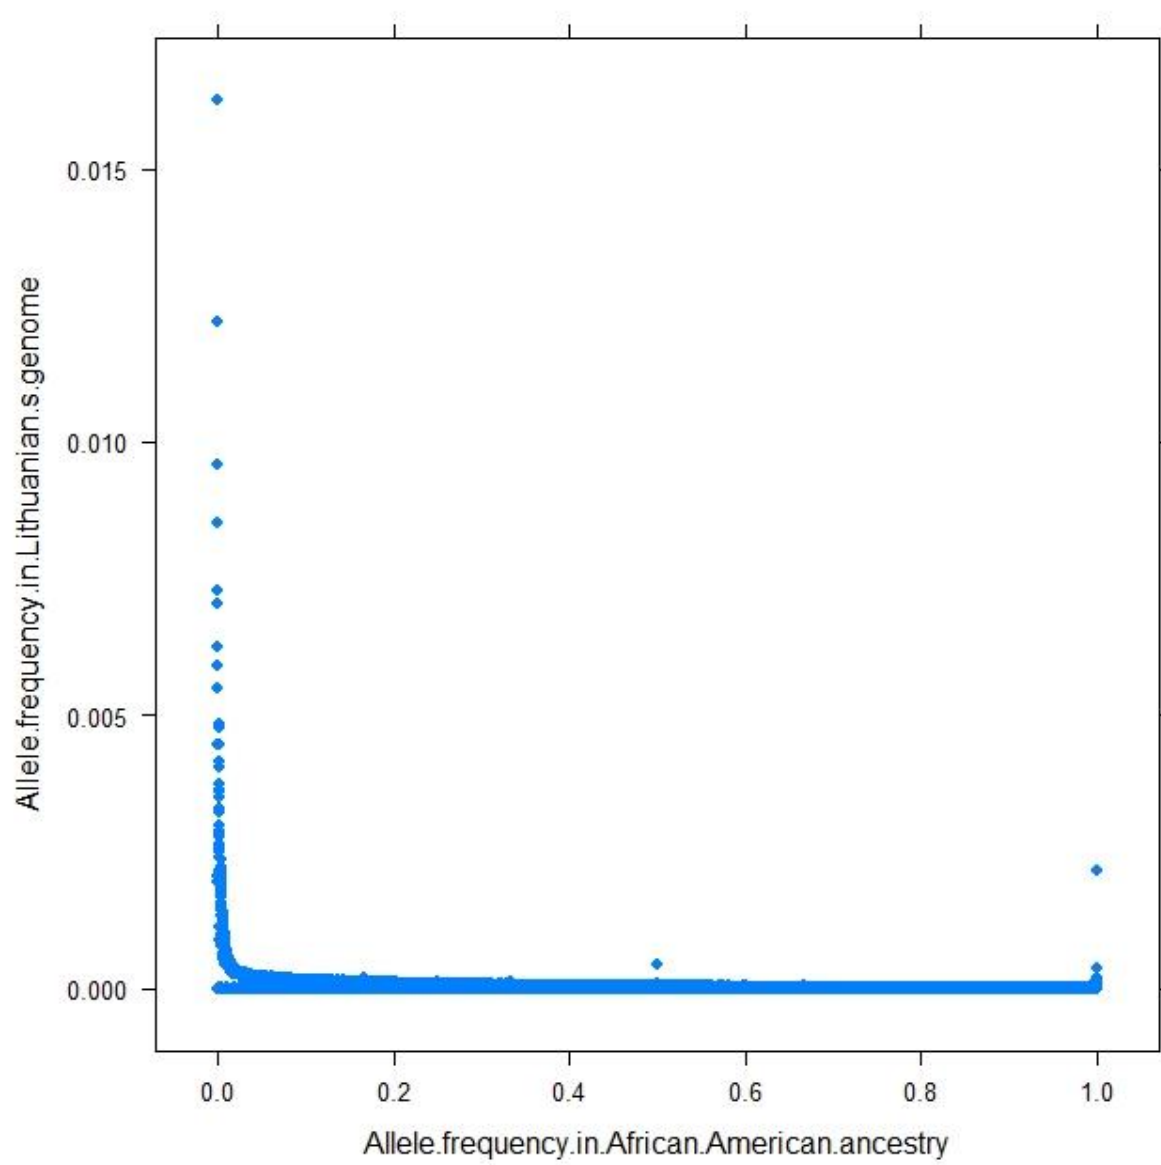

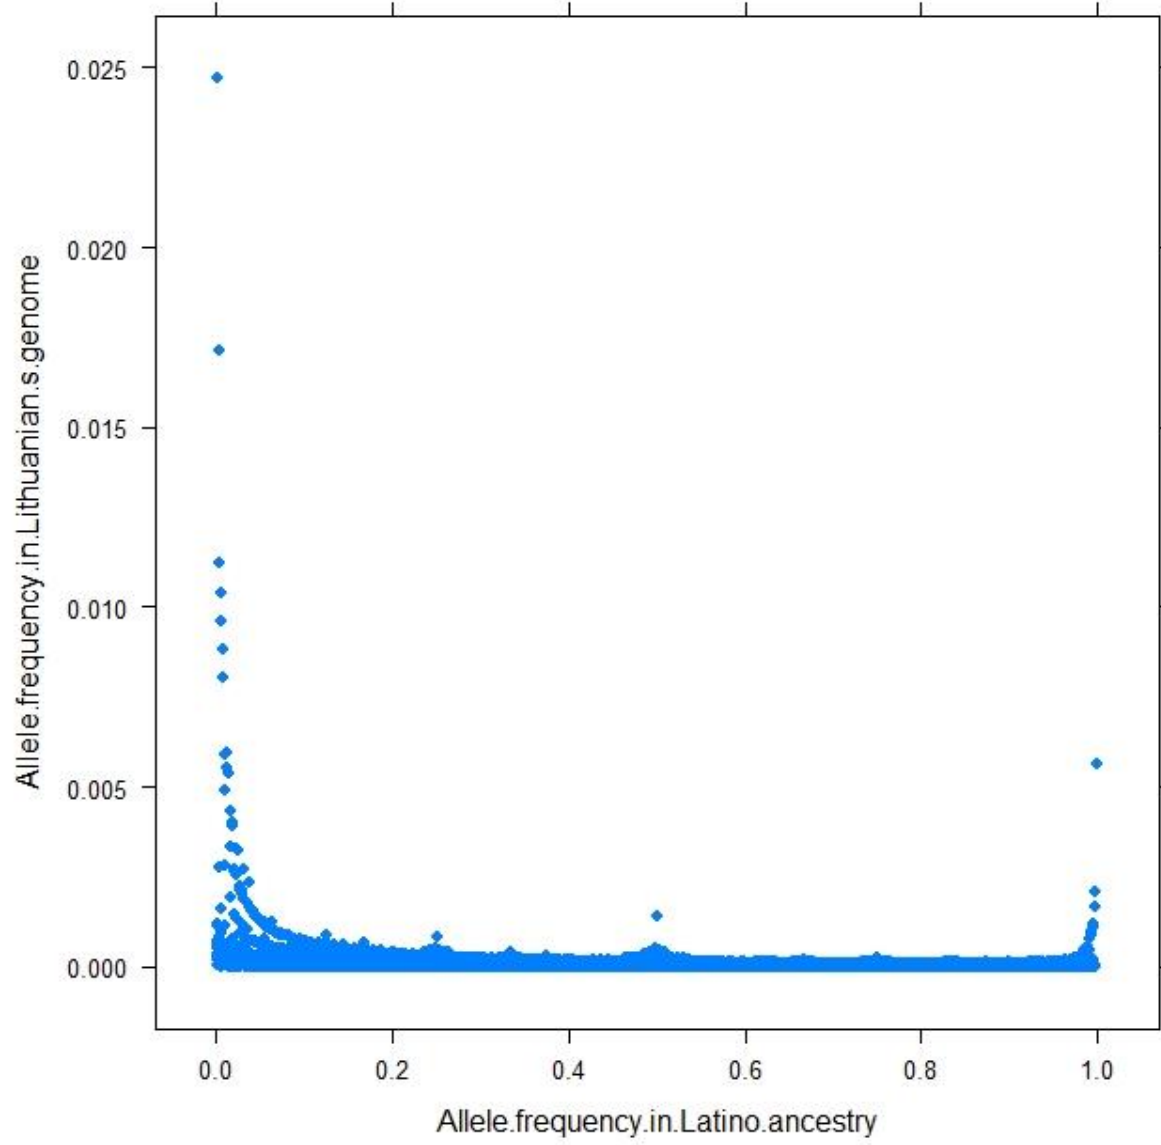

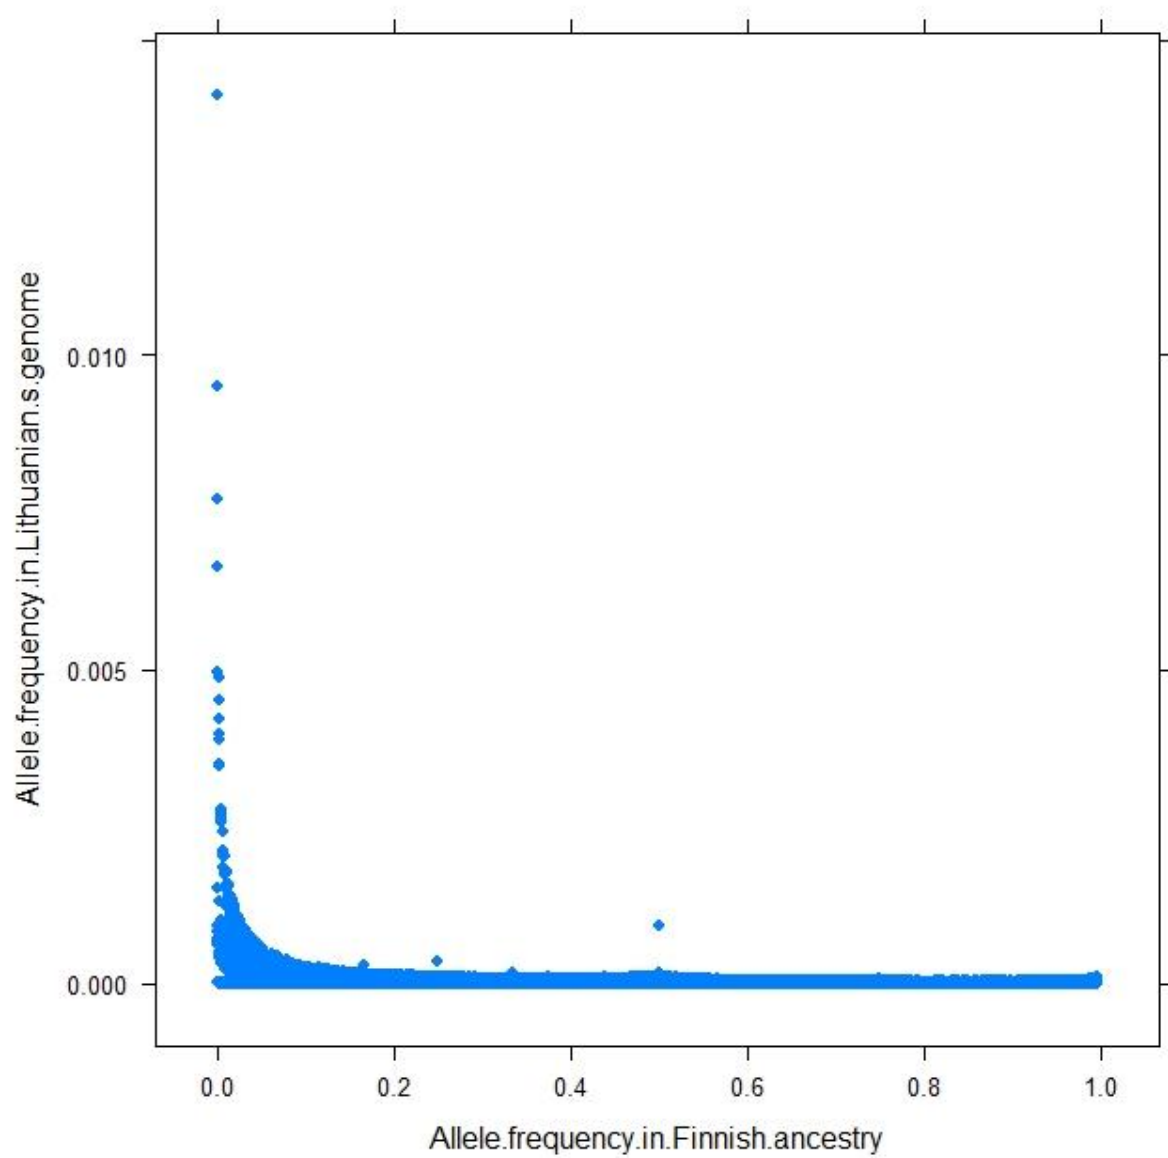

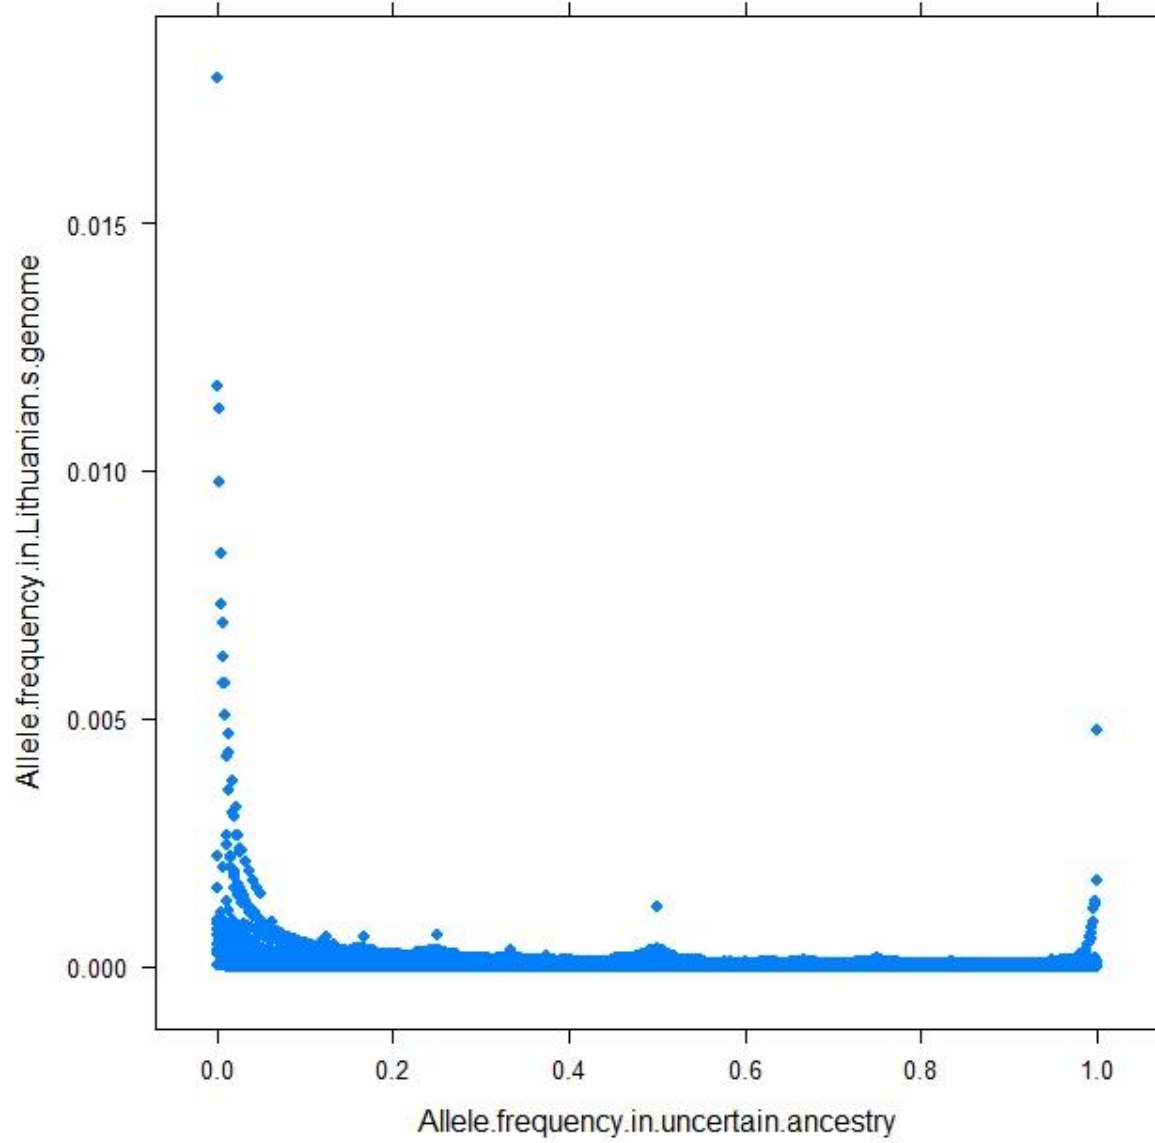



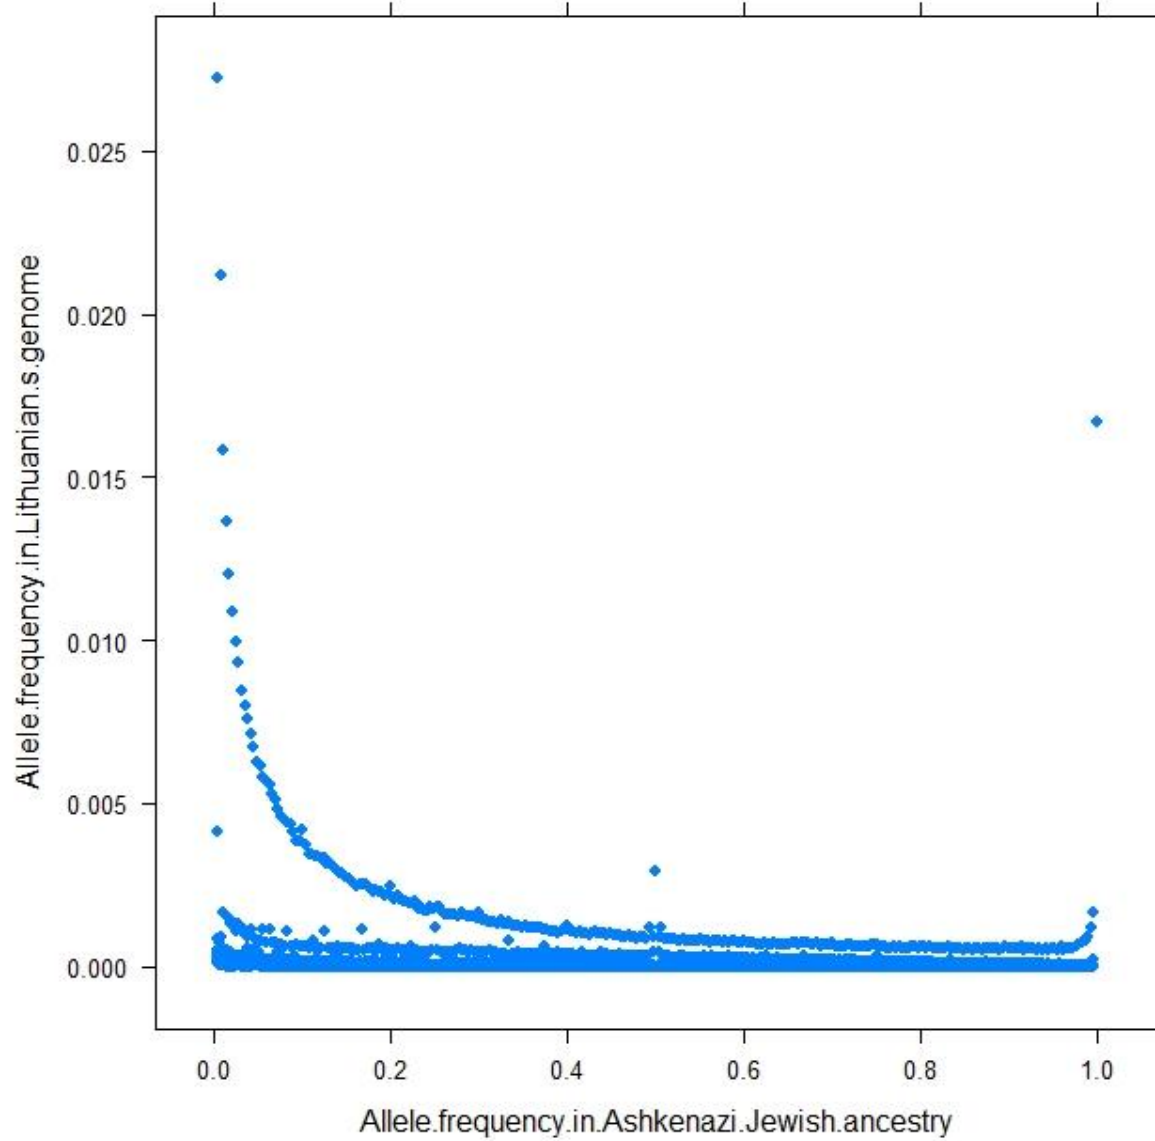

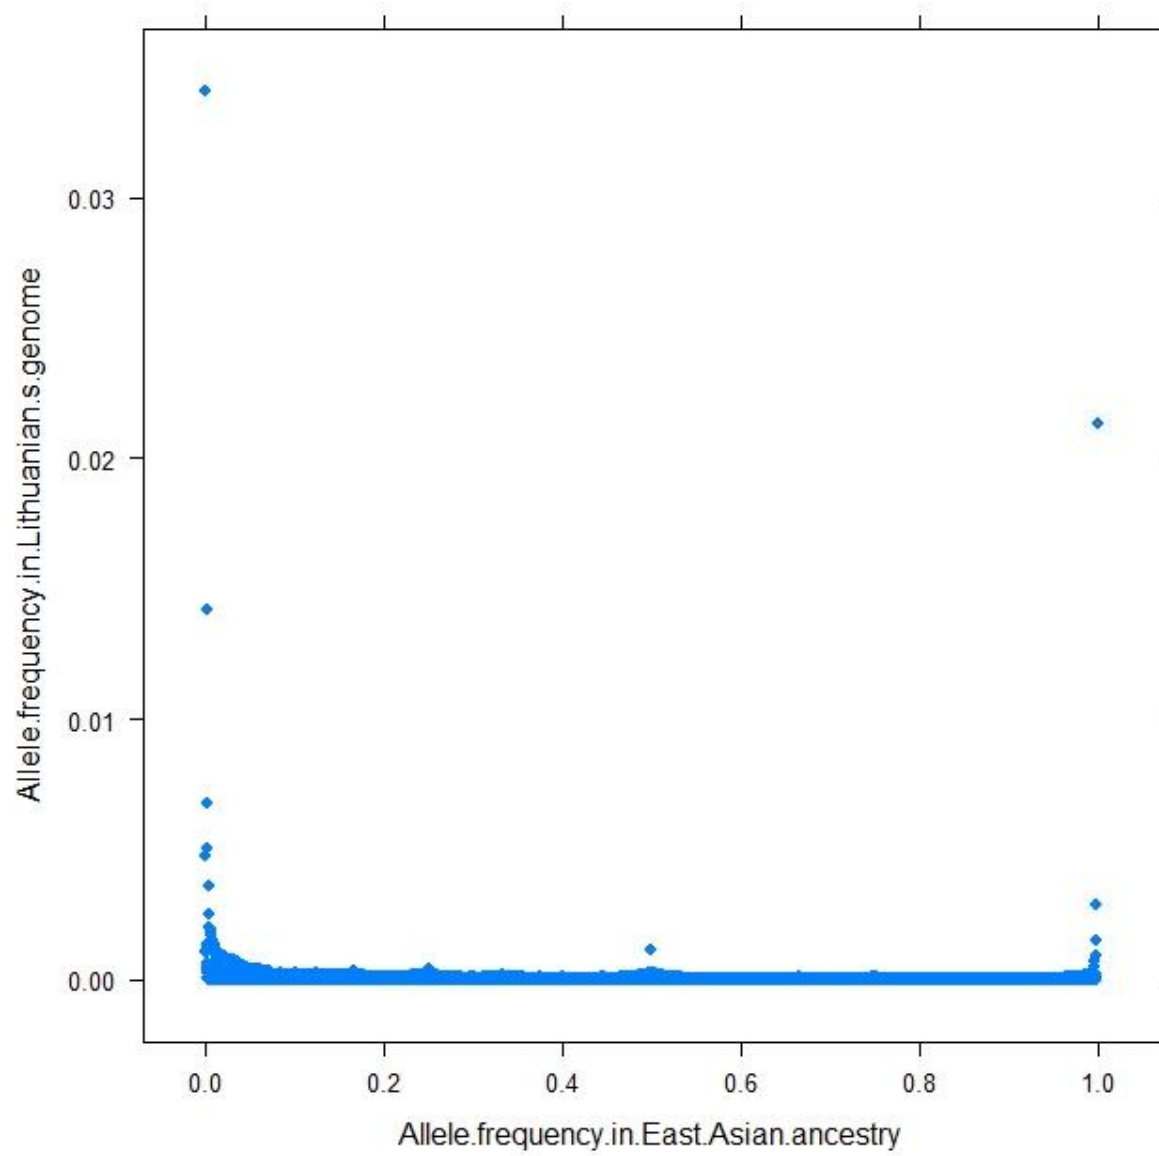

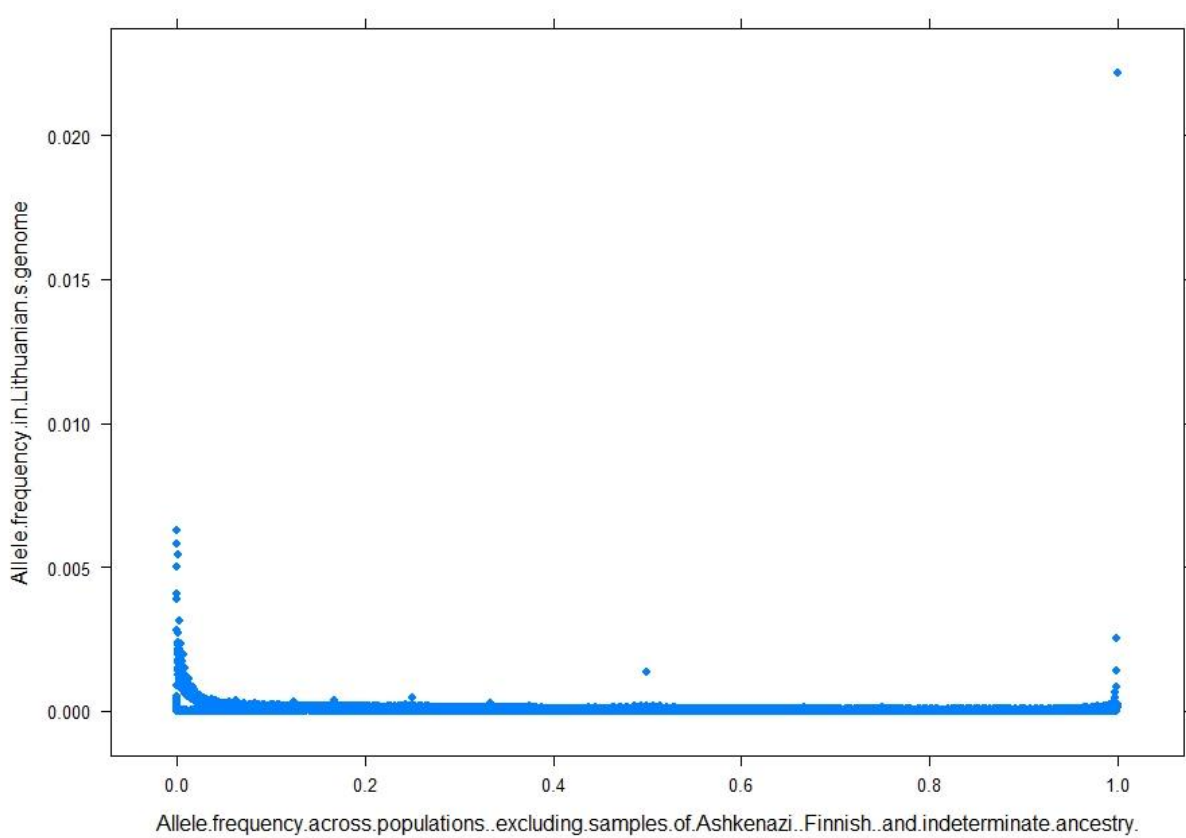

**Figure S8.** Allele frequency distribution comparison between the Lithuanian and African-American, Latino ancestry, Finish, uncertain, Ashkenazi Jewish, and east Asian ancestry genomes.
